# Supplementary material
Source: PubMed Central journal article supplement (PMC2255072)
Supplement: 97320630002128S1.pdf [file 97320630002128S1.pdf]

### Supplementary material

$$H' = \sum_{i=1}^n p_i \log_2 p_i \rightarrow (1)$$

Where n is the total number of SNP/indel states (10) pi= proportion of ESTs in the i<sup>th</sup> type of SNP/indel state. The calculated value is divided by the log<sub>2</sub>10 to get uniformity.

| Result                      | Abnormal apex | Normal apex | Female inflorescence | Male inflorescence | Immature zygotic embryo | Mesocarp Tissue | Total |
|-----------------------------|---------------|-------------|----------------------|--------------------|-------------------------|-----------------|-------|
| Total No of ESTs            | 998           | 313         | 349                  | 625                | 126                     | 3039            | 5452  |
| Total sequences analysed    | 242           | 32          | 38                   | 103                | 40                      | 121             | 576   |
| No. of contigs              | 86            | 13          | 16                   | 44                 | 9                       | 31              | 199   |
| Total SNPs detected         | 309           | 62          | 103                  | 239                | 7                       | 597             | 1317  |
| Total consensus size (bp)   | 35034         | 5296        | 5601                 | 19790              | 4766                    | 20534           | 91021 |
| Frequency of SNP per 100 bp | 0.88          | 1.17        | 1.84                 | 1.21               | 0.15                    | 2.91            | 1.36  |
| Transitions                 |               |             |                      |                    |                         |                 |       |
| C/T                         | 111           | 11          | 25                   | 90                 | 3                       | 149             | 389   |
| G/A                         | 74            | 12          | 32                   | 48                 | 0                       | 135             | 301   |
| Transversions               |               |             |                      |                    |                         |                 |       |
| A/T                         | 24            | 5           | 7                    | 19                 | 0                       | 38              | 93    |
| C/G                         | 40            | 12          | 13                   | 33                 | 2                       | 61              | 161   |
| G/T                         | 20            | 2           | 15                   | 13                 | 0                       | 50              | 100   |
| A/C                         | 27            | 12          | 9                    | 30                 | 1                       | 57              | 136   |
| Indels                      |               |             |                      |                    |                         |                 |       |
| A                           | 5             | 2           | 0                    | 1                  | 0                       | 26              | 34    |
| C                           | 4             | 1           | 0                    | 0                  | 0                       | 18              | 23    |
| G                           | 1             | 3           | 0                    | 3                  | 0                       | 42              | 49    |
| T                           | 3             | 2           | 2                    | 2                  | 1                       | 21              | 31    |
| Shannon index               | 0.02          | 0.60        | 0.43                 | 0.16               | 0.31                    | 0.16            | 0.03  |

**Table 1:** Summary of SNPs and indels detected in the oil palm EST libraries
